# Supplementary material
Source: Springer Nature journal article supplement (https://www.springermedizin.de/resource/supplementary/13018_2007_63_MOESM10_ESM.pdf/9636242)
Supplement: MOESM10 [file 9636242]

Healthy Achilles tendon

Diameter <math>\leq 6\text{mm}</math>, no hypoechoic signals, normal capillary tendon flow, no neovessels

Extrinsic factors

Intrinsic factors

Asymptomatic tendon

Diameter mean  $6.8\text{mm}$ , no neovessels on Power Doppler, increased capillary tendon blood flow, hypoechoic areas

Asymptomatic tendon, development of Power Doppler flow, no Colour Doppler flow, tendon diameter mean  $7.6\text{mm}$ , increased capillary blood flow

Symptomatic tendinopathy, neovessels on Power/Colour Doppler, tendon diameter mean  $11.0\text{mm}$ , increased capillary blood flow, hypoechoic areas

Achilles tendon rupture
